# Supplementary material for: A high stretchability fiber based on a synergistic three-dimensional conductive network for wide-range strain sensing
Source: Royal Society of Chemistry journal article supplement (doi:10.1039/d4na00770k), 2024-11-25
Supplement: d4na00770k1.pdf [file d4na00770k1.pdf]

## **High stretchability fiber based on synergistic three-dimensional conductive network for wide-range strain sensing**

Wei Shi<sup>a,‡</sup>, Xing Yang<sup>a,‡</sup>, Langhuan Lei<sup>a,‡</sup>, Xiaozhi Huang<sup>b</sup>, Jiali Lin<sup>a</sup>, Qiuyu Liang<sup>a</sup>, Wei Li<sup>\*b</sup>,  
Jianrong Yang<sup>\*a</sup>

<sup>a</sup>Health Management Research Institute, People's Hospital of Guangxi Zhuang Autonomous Region and Guangxi Academy of Medical Sciences, Nanning, 530021, China

<sup>b</sup>Health Management Center, People's Hospital of Guangxi Zhuang Autonomous Region and Guangxi Academy of Medical Sciences, Nanning, 530021, China

*\*Corresponding E-mail: liwei2186gxqyy@163.com; jianguansuo2024YJR@163.com*

*‡These authors contributed equally to the work.*

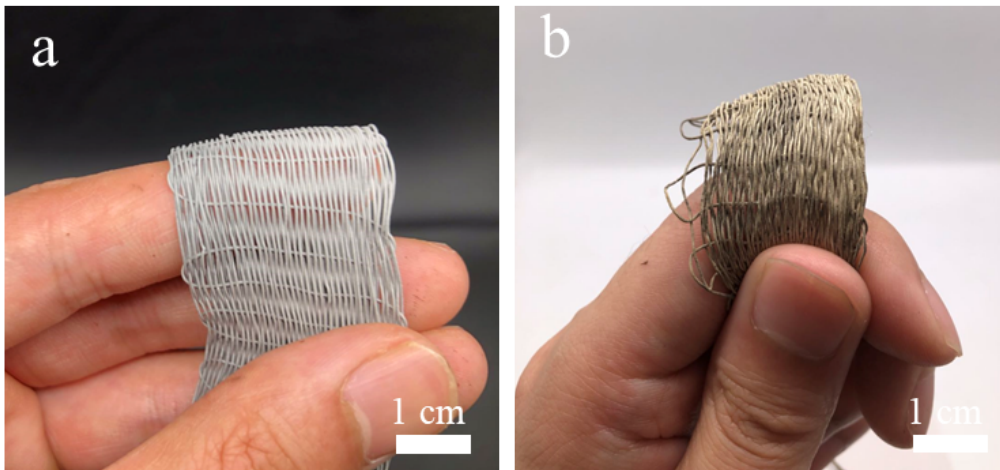

Figure S1. Digital photos of (a) MGT (b) AMGT fibers woven into fabric.

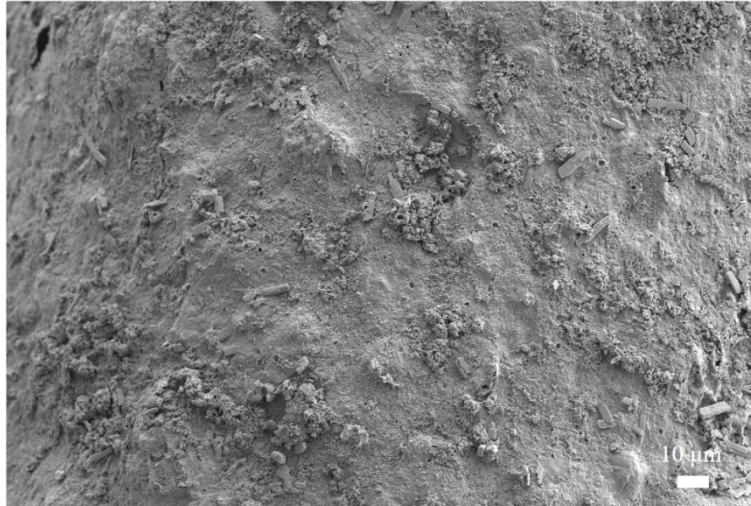

Figure S2. SEM image of AMGT fiber surface

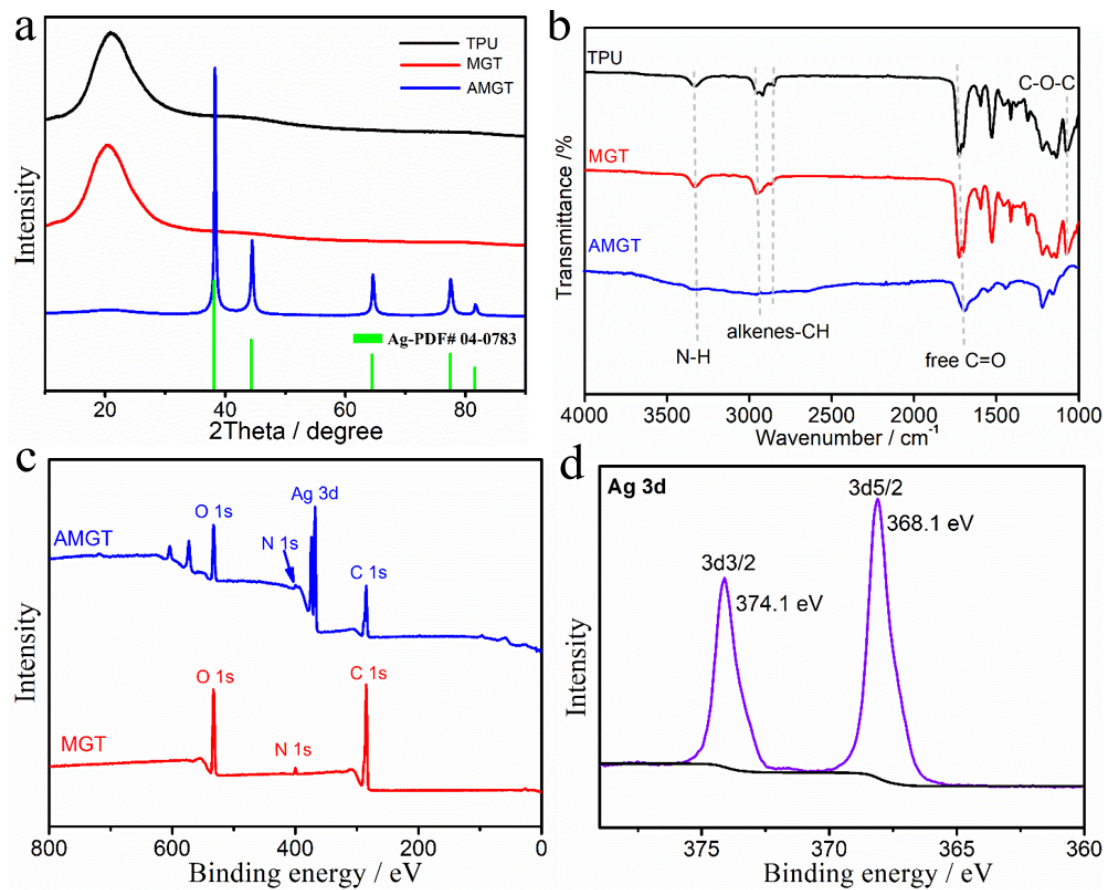

Figure S3. (a) XRD pattern. (b) FT-IR of TPU, MGT and AMG fibers. (c) XPS spectra survey of MGT and AMG fibers. (d) high resolution spectra for Ag 3d.

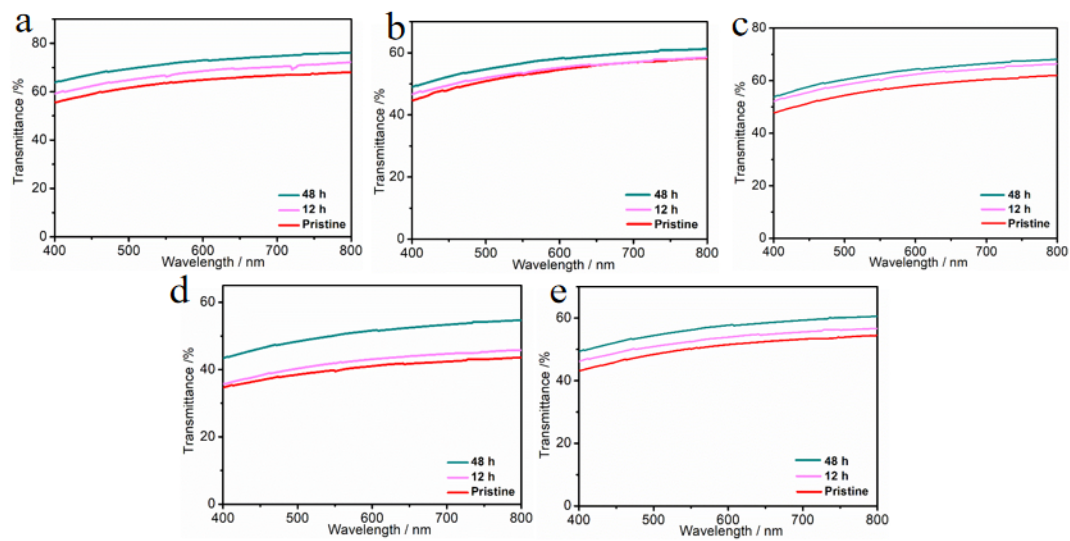

Figure S4. Ultraviolet-visible light test data of DMF suspension with MWCNT: GE= (a) 1:0. (b) 3:1. (c) 1:1. (d) 1:3. (e) 0:1 in pristine state, after standing for 12 h and 48 h.

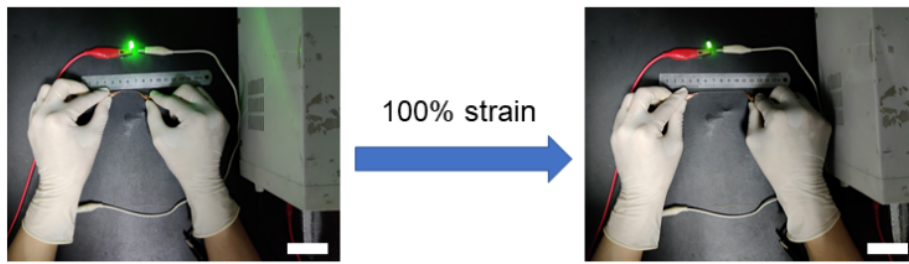

Figure S5. The conductive AMGT fiber lights up the small LED when stretched at 100% strain, the scale bar is 5 cm.

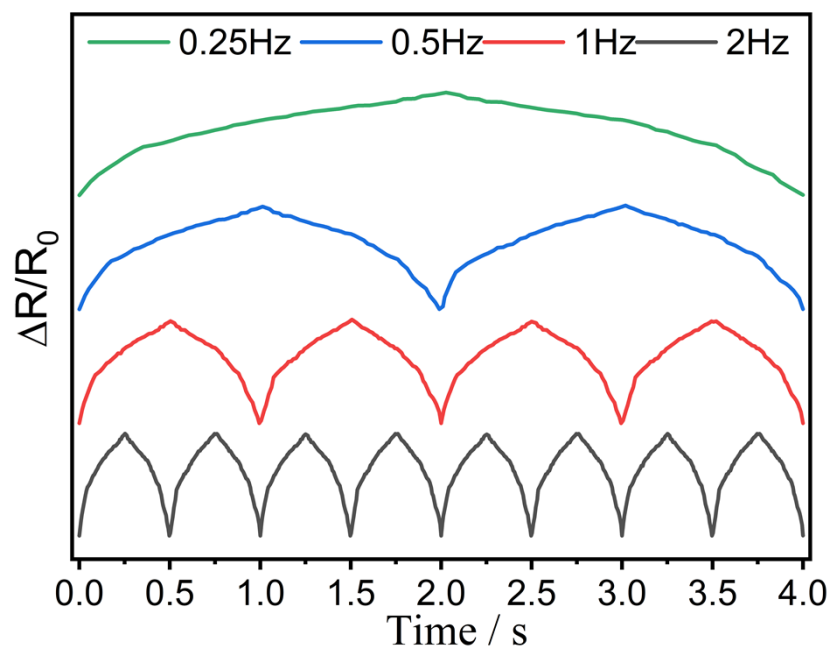

Figure S6. Relative resistance change under cyclic stretching/releasing with a strain of 50% at frequency of 0.25, 0.5, 1, and 2 Hz

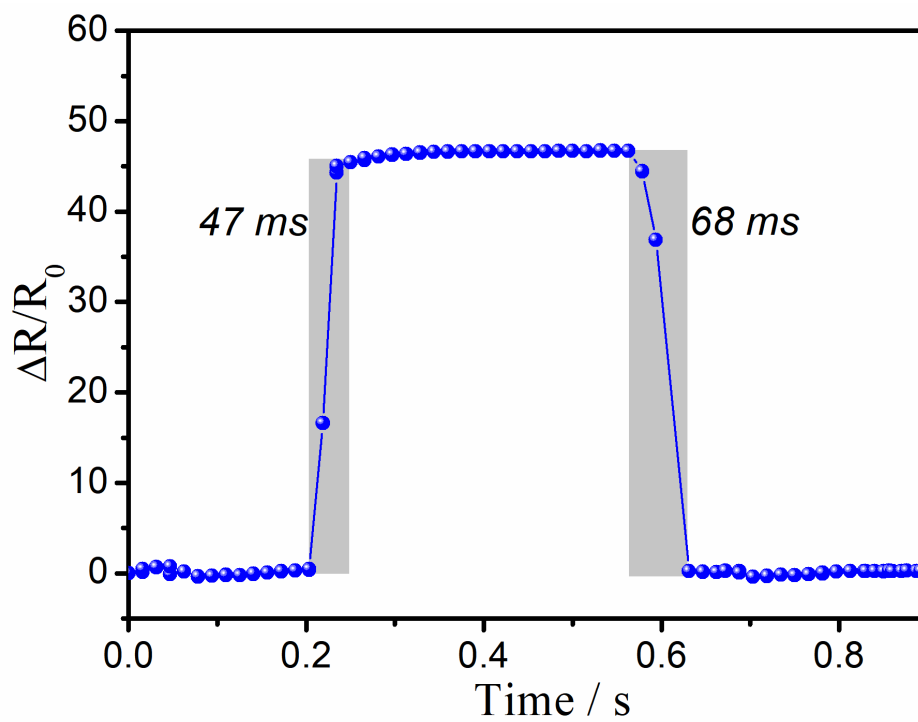

Figure S7. Response and recovery time of the strain sensor.



**Table S1.** Comparison of initial conductivity of conductive fiber samples

| <b>Sample</b>                      | <b>Initial conductivity (S/cm)</b> |
|------------------------------------|------------------------------------|
| AgNPs/TPU                          | 90                                 |
| AMGT with 0.1wt.% MWCNT/GE fillers | 92                                 |
| AMGT with 0.3wt.% MWCNT/GE fillers | 116                                |
| AMGT with 0.5wt.% MWCNT/GE fillers | 158                                |
| AMGT with 1wt.% MWCNT/GE fillers   | 245                                |
